# Supplementary material for: Follow-up of Interleukin 6 and Other Blood Markers during the Hospitalization of COVID-19 Patients: A Single-Center Study
Source: MDPI journal article supplement (doi:10.3390/covid2110114), 2022-11-10
Supplement: s1 [file s1]

## Supplementary material

### Follow-up of interleukin 6 and other blood markers during the hospitalization of COVID-19 patients: a single-center study

**Supplementary Table S1.** Clinical characteristics of COVID-19 patients (N=31)

| Characteristic               | Mild-moderate (n=17) | Severe-critical (n=14) | % of mild-moderate/<br>% of severe-critical<br>patients | <i>p</i> -value |
|------------------------------|----------------------|------------------------|---------------------------------------------------------|-----------------|
| <b>Age, years</b>            |                      |                        |                                                         |                 |
| Median                       | 60                   | 67                     |                                                         | 0.2412          |
| Interquartile range          | 43.5 - 73.5          | 61.8 - 77.5            |                                                         |                 |
| <66                          | 6                    | 7                      | 35 / 50                                                 |                 |
| ≥ 66                         | 11                   | 7                      | 65 / 50                                                 |                 |
| <b>Sex</b>                   |                      |                        |                                                         |                 |
| Female                       | 10                   | 5                      | 59 / 43                                                 | 0,3750          |
| Male                         | 7                    | 8                      | 41 / 57                                                 |                 |
| <b>Oxygen saturation, %</b>  |                      |                        |                                                         |                 |
| Median                       | 97.0                 | 89.5                   |                                                         | <0.0001         |
| Interquartile range          | 94.5 - 98.0          | 78.3 - 94.6            |                                                         |                 |
| <b>Triage, level</b>         |                      |                        |                                                         |                 |
| 2                            | 0                    | 9                      | 0 / 64                                                  | 0.0071          |
| 3                            | 15                   | 3                      | 88 / 21                                                 |                 |
| 4                            | 2                    | 1                      | 12 / 7                                                  |                 |
| 5                            | 0                    | 1                      | 0 / 7                                                   |                 |
| <b>Glycaemia, mg/dL</b>      |                      |                        |                                                         |                 |
| Median                       | 110.0                | 117.5                  |                                                         | 0,1635          |
| Interquartile range          | 97.8 – 131.5         | 107.5 – 197.0          |                                                         |                 |
| <b>Blood systolic, mmHg</b>  |                      |                        |                                                         |                 |
| Median                       | 134                  | 135                    |                                                         | 0,7355          |
| Interquartile range          | 122 – 155            | 117 – 147              |                                                         |                 |
| <b>Blood diastolic, mmHg</b> |                      |                        |                                                         |                 |
| Median                       | 82                   | 79                     |                                                         | 0,7518          |
| Interquartile range          | 71 – 88              | 75 – 89                |                                                         |                 |

**Supplementary Table S2.** Blood markers at hospital admission of mild-moderate and severe-critical patients (N=31) and discharge of severe-critical patients (N=14). HD: markers at hospital discharge.

| Levels of markers in peripheral blood | Mean ( $\pm$ SD) | Median [IQR]        | p-value  |
|---------------------------------------|------------------|---------------------|----------|
| <b>IL-6 (pg/mL)</b>                   |                  |                     |          |
| Mild-moderate                         | 17.3 (16.8)      | 9.9 [4.6-33-3]      | < 0.0001 |
| Severe-critical                       | 79.7 (64.3)      | 56.9 [32.6-18.4]    |          |
| Severe-critical HD                    | 13.0 (15.7)      | 7.0 [4.1 – 14.5]    | 0.0002   |
| <b>PCT (ng/mL)</b>                    |                  |                     |          |
| Mild-moderate                         | 0.04 (0.04)      | 0.02 [<0.01-0.06]   | 0.0077   |
| Severe-critical                       | 0.52 (0.83)      | 0.10 [0.05 – 1.05]  |          |
| Severe-critical HD                    | 0.14 (0.18)      | 0.04 [< 0.01- 0.35] | 0.0137   |
| <b>D-dimer (ng/FEU/mL)</b>            |                  |                     |          |
| Mild-moderate                         | 1491 (2045)      | 689 [435 – 1368]    | 0.0090   |
| Severe-critical                       | 3919 (4285)      | 2155 [1193 - 9788]  |          |
| Severe-critical HD                    | 3858 (6745)      | 1680 [800 – 3626]   | 0.3396   |
| <b>CRP (mg/L)</b>                     |                  |                     |          |
| Mild-moderate                         | 32.1 (37.8)      | 21.3 [12.8 – 34.8]  | 0.0006   |
| Severe-critical                       | 180 (139.2)      | 139 [42.1 – 263]    |          |
| Severe-critical HD                    | 38.1 (40.2)      | 24.2 [15.0 – 52.0]  | 0.0034   |
| <b>Cortisol (ug/dL)</b>               |                  |                     |          |
| Mild-moderate                         | 16.2 (7.7)       | 13.5 [12.2 – 20.7]  | 0.2365   |
| Severe-critical                       | 19.7 (8.7)       | 17.8 [14.3 – 23.8]  |          |
| Severe-critical HD                    | 7.9 (8.0)        | 4.0 [0.9 – 14.8]    | 0.0012   |
| <b>DHEA-S (ug/dL)</b>                 |                  |                     |          |
| Mild-moderate                         | 133 (69.9)       | 124.3 [75.0 – 189]  | 0.0394   |
| Severe-critical                       | 88.7 (39.2)      | 85.8 [55.6 – 126]   |          |
| Severe-critical HD                    | 25.8 (23.7)      | 21.8 [6.5 – 31.2]   | 0.0001   |
| <b>25-OH Vitamin D (ng/mL)</b>        |                  |                     |          |
| Mild-moderate                         | 22.3 $\pm$ 12.4  | 19.9 [12.4 – 29.3]  | 0.4347   |
| Severe-critical                       | 19.3 $\pm$ 8.5   | 19.7 [11.2 – 24.8]  |          |
| Severe-critical HD                    | 18.5 $\pm$ 10.7  | 15.6 [9.0 – 26.0]   | 0.1677   |
| <b>Positive neutralizing IgGs (%)</b> |                  |                     |          |
| Mild-moderate                         | 23.5             |                     |          |
| Severe-critical                       | 50               |                     |          |
| Severe-critical HD                    | 85.7             |                     |          |
| <b>Positive viremia (%)</b>           |                  |                     |          |
| Mild-moderate                         | 31.3             |                     |          |
| Severe-critical                       | 92.9             |                     |          |
| Severe-critical HD                    | 21.4             |                     |          |

**Supplementary Table S3.** Ground-glass opacity (GGO) percent on chest computed tomography of 14 severe-critical COVID-19 patients

| Patient | Ground-glass opacity (%) |
|---------|--------------------------|
| 1       | 36.0                     |
| 2       | 1.0                      |
| 3       | 3.7                      |
| 4       | 25.0                     |
| 5       | 7.6                      |
| 6       | 29.5                     |
| 7       | 6.0                      |
| 8       | 0.1                      |
| 9       | 2.4                      |
| 10      | 9.4                      |
| 11      | 26.5                     |
| 12      | 25.0                     |
| 13      | 0.3                      |
| 14      | 5.5                      |

**Supplementary Table S4.** Cortisol/DHEA-S ratio in mild-moderate and severe-critical patients with COVID-19 on admission to the emergency room (N=31)

| Levels of markers in peripheral blood | Mean (± SD) | Median [IQR]       | p-value |
|---------------------------------------|-------------|--------------------|---------|
| <b>Cortisol/DHEA-S ratio</b>          |             |                    |         |
| Mild-moderate                         | 0.17 (0.14) | 0.14 [0.08 – 0.19] | 0.0494  |
| Severe-critical                       | 0.28 (0.26) | 0.24 [0.13 – 0.30] |         |

**Supplementary Table S5.** Blood markers in ICU (n=9) and non-ICU (n=22) patients

| Levels of markers in peripheral blood | Mean ( $\pm$ SD) | Median [IQR]           | p-value       |
|---------------------------------------|------------------|------------------------|---------------|
| <b>IL-6 (pg/mL)</b>                   |                  |                        |               |
| ICU                                   | 102 (70.1)       | 93.8 [37.9 - 165]      | <b>0.0011</b> |
| Non-ICU                               | 29.6 (31.9)      | 17.9 [6.0 - 44.5]      |               |
| <b>PCT (ng/mL)</b>                    |                  |                        |               |
| ICU                                   | 0.72 (0.91)      | 0.40 [0.09 - 1.04]     | <b>0.0027</b> |
| Non-ICU                               | 0.11 (0.36)      | 0.02 [ $<0.01$ - 0.06] |               |
| <b>D-dimer (ng/FEU/mL)</b>            |                  |                        |               |
| ICU                                   | 4576 (4963)      | 2753 [1050 - 8990]     | <b>0.0330</b> |
| Non-ICU                               | 1774 (2222)      | 732 [448 - 2078]       |               |
| <b>CRP (mg/L)</b>                     |                  |                        |               |
| ICU                                   | 181 (147)        | 146 [53.1 - 299]       | <b>0.0277</b> |
| Non-ICU                               | 70.5 (99.4)      | 28.9 [17.1 - 62.1]     |               |
| <b>Cortisol (ug/dL)</b>               |                  |                        |               |
| ICU                                   | 19.1 (10.2)      | 15.6 [11.6 - 25.5]     | 0.6503        |
| Non-ICU                               | 17.6 (7.4)       | 15.8 [12.7 - 22.7]     |               |
| <b>DHEA-S (ug/dL)</b>                 |                  |                        |               |
| ICU                                   | 92.1 (41.4)      | 89.4 [55.1 - 131]      | 0.2173        |
| Non-ICU                               | 121 (66.9)       | 118 [62.6 - 177]       |               |
| <b>25-OH Vitamin D (ng/mL)</b>        |                  |                        |               |
| ICU                                   | 17.0 (7.5)       | 13.6 [10.8 - 21.8]     | 0.1978        |
| Non-ICU                               | 22.6 (11.6)      | 22.7 [13.0 - 29.2]     |               |
| <b>Positive neutralizing IgGs (%)</b> |                  |                        |               |
| ICU                                   | 66.7             |                        |               |
| Non-ICU                               | 18.2             |                        |               |
| <b>Positive viremia (%)</b>           |                  |                        |               |
| ICU                                   | 77.8             |                        |               |
| Non-ICU                               | 47.6             |                        |               |

**Supplementary Table S6.** Association between initial levels of blood markers on admission to the emergency room and hospital stay length (N=14)

| Blood marker | Pearson coefficient (r) | p-value      |
|--------------|-------------------------|--------------|
| IL-6         | 0.36                    | 0.232        |
| PCT          | 0.24                    | 0.431        |
| DD           | -0.13                   | 0.709        |
| Cortisol     | 0.56                    | <b>0.046</b> |
| DHEA-S       | 0.08                    | 0.802        |

**Supplementary Table S7.** Association between the first positive (n=4) or negative (n=7) event and the levels of blood markers on the day of the event.

| Blood Marker        | Mean (± SD) | Median [IQR]       | p-value |
|---------------------|-------------|--------------------|---------|
| IL-6 (pg/mL)*       |             |                    |         |
| Positive event      | 3.9 (3.1)   | 4.1 [0.9 – 6.6]    | 0.049   |
| Negative event      | 86.1 (57.9) | 77.0 [39.1 – 122]  |         |
| PCT (ng/mL)         |             |                    |         |
| Positive event      | 0.33 (0.37) | 0.27 [0.03 – 0.71] | 0.648   |
| Negative event      | 0.21 (0.25] | 0.14 [0.04 – 0.33] |         |
| D-dimer (ng/FEU/mL) |             |                    |         |
| Positive event      | 1618 (1784) | 868 [508-3479]     | 0.331   |
| Negative event      | 3086 (3598) | 2255 [719 – 4383]  |         |
| CRP (mg/L)          |             |                    |         |
| Positive event      | 66.7 (78.9) | 40.8 [9.3 – 150]   | 0.979   |
| Negative event      | 82.9 (59.4) | 64.8 [48.2 – 127]  |         |

\*Additionally, IL-6 showed a significant correlation with the second event (N=6).

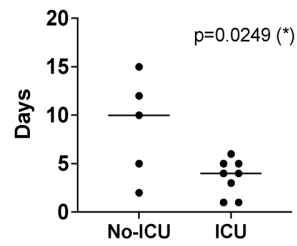

**Supplementary Figure S1.** Days up to the exponential change in anti-SARS-CoV-2 neutralizing antibodies (IgG) during hospitalization of admitted to ICU and non-admitted to ICU severe-critical patients with COVID-19.

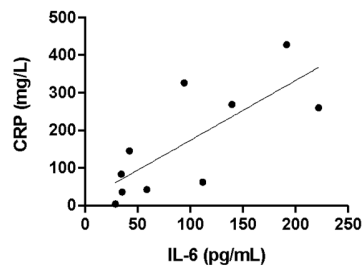

**Supplementary Figure S2.** Correlation between IL-6 and CRP levels in severe-critical patients with COVID-19. The figure shows a linear correlation between blood IL-6 and CRP at hospital admission of severe-critical COVID-19 patients, Pearson coefficient = 0.7595 ( $p=0.0108$ ).



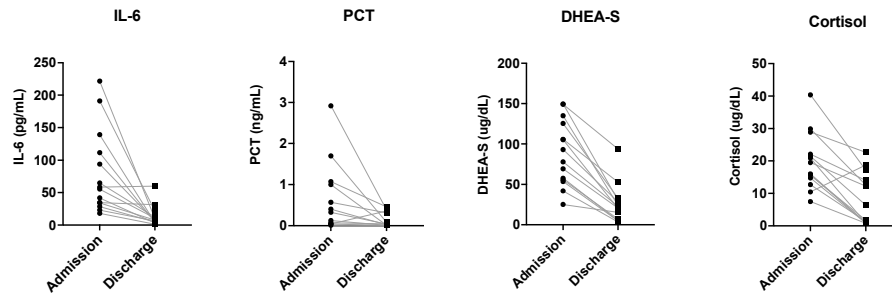

**Supplementary Figure S3.** Blood markers in hospital admission and discharge of severe-critical patients with COVID-19. Markers were measured when they were admitted to hospital care compared to levels at hospital discharge. p-values for IL-6, PCT, DHEA-S, and cortisol were 0.0002, 0.0137, 0.0001 and 0.0012 respectively (Wilcoxon test).
